# Supplementary material for: Bioactive Lipids of Seaweeds from the Portuguese North Coast: Health Benefits versus Potential Contamination
Source: MDPI journal article supplement (doi:10.3390/foods10061366), 2021-06-12
Supplement: s1 [file s1]

**Table S1.** Experimental values for the lipid profile and quality indices in the harvested seaweeds.

[illegible]

|       |         |  |         |  |         |  |         |  |         |  |         |  |         |  |         |  |         |  |
|-------|---------|--|---------|--|---------|--|---------|--|---------|--|---------|--|---------|--|---------|--|---------|--|
| ESFA  | 1.8E-01 |  | 1.7E-01 |  | 2.4E-01 |  | 6.8E-01 |  | 7.7E-01 |  | 4.6E-01 |  | 2.8E-01 |  | 2.8E-01 |  | 2.9E-01 |  |
| EMUFA | 6.8E-01 |  | 6.9E-01 |  | 5.6E-01 |  | 2.4E-01 |  | 2.6E-01 |  | 4.2E-01 |  | 5.8E-01 |  | 5.8E-01 |  | 5.2E-01 |  |
| SPUFA | 1.4E-01 |  | 1.4E-01 |  | 2.0E-01 |  | 7.6E-02 |  | 1.1E-01 |  | 1.3E-01 |  | 1.4E-01 |  | 1.5E-01 |  | 1.9E-01 |  |
| Σω3   | 5.2E-02 |  | 5.3E-02 |  | 8.0E-02 |  | 7.6E-02 |  | 1.1E-01 |  | 1.3E-01 |  | 7.5E-02 |  | 8.0E-02 |  | 1.1E-01 |  |
| Σω6   | 7.6E-02 |  | 7.5E-02 |  | 1.2E-01 |  |         |  |         |  |         |  | 6.7E-02 |  | 6.6E-02 |  | 7.2E-02 |  |
| AI    | 4.0E-01 |  | 3.7E-01 |  | 5.5E-01 |  | 8.0E-01 |  | 6.9E-01 |  | 4.8E-01 |  | 7.4E-01 |  | 7.3E-01 |  | 7.6E-01 |  |
| TI    | 3.3E-01 |  | 2.9E-01 |  | 1.7E-01 |  |         |  |         |  | 1.1E+00 |  | 1.5E-01 |  | 4.5E-01 |  | 4.1E-01 |  |
| HH    | 4.1E+00 |  | 4.9E+00 |  | 3.0E+00 |  | 8.4E-01 |  | 9.2E-01 |  |         |  | 2.3E+00 |  | 2.4E+00 |  | 2.2E+00 |  |

**Table S1.** Experimental values for the lipid profile and quality indices in the harvested seaweeds (Cont.).

| Seaweeds    | <i>Gracilaria</i> spp. |         |         |         | <i>L. ochroleuca</i> |         |         |         | <i>O. pinnatifida</i> |         |         |         |         |         |         |         |
|-------------|------------------------|---------|---------|---------|----------------------|---------|---------|---------|-----------------------|---------|---------|---------|---------|---------|---------|---------|
| Harvest     | Spring                 |         | Autumn  |         | Spring               |         | Summer  |         | Spring                |         | Summer  |         | Autumn  |         | Winter  |         |
| Fatty acids | %                      | SD      | %       | SD      | %                    | SD      | %       | SD      | %                     | SD      | %       | SD      | %       | SD      | %       | SD      |
| SFA         |                        |         |         |         |                      |         |         |         |                       |         |         |         |         |         |         |         |
| C14:0       | 4.8E-02                | 5.5E-03 | 4.8E-02 | 3.7E-04 | 4.4E-02              | 1.7E-03 | 3.9E-02 | 8.0E-04 | 3.3E-02               | 1.7E-03 | 3.1E-02 | 1.5E-03 | 4.5E-02 | 1.5E-03 | 3.1E-02 | 5.7E-03 |
| C15:0       |                        |         |         |         |                      |         | 2.6E-03 | 1.6E-04 | 3.5E-03               | 1.0E-05 |         |         | 5.4E-03 | 2.4E-04 |         |         |
| C16:0       | 4.7E-01                | 9.2E-03 | 2.8E-01 | 1.2E-02 | 2.9E-01              | 1.9E-02 | 1.9E-01 | 2.9E-03 | 2.6E-01               | 2.8E-02 | 3.1E-01 | 2.2E-02 | 2.3E-01 | 1.1E-02 | 3.0E-01 | 1.4E-02 |
| C17:0       |                        |         |         |         |                      |         | 2.4E-03 | 8.6E-07 | 2.2E-03               | 5.8E-05 |         |         | 2.1E-03 | 1.5E-04 |         |         |
| C18:0       | 2.8E-01                | 1.8E-02 | 3.4E-02 | 9.8E-03 | 5.9E-02              | 4.8E-03 | 5.2E-02 | 4.4E-03 | 5.7E-02               | 4.1E-03 | 8.2E-02 | 9.0E-03 | 6.2E-02 | 5.4E-03 | 3.4E-02 | 3.3E-03 |
| C20:0       |                        |         |         |         | 5.4E-03              | 2.7E-04 | 3.7E-03 | 2.7E-04 | 2.4E-03               | 2.0E-04 |         |         | 1.9E-03 | 9.9E-05 | 7.0E-03 | 4.0E-03 |
| C21:0       |                        |         |         |         |                      |         |         |         |                       |         |         |         |         |         |         |         |
| C22:0       |                        |         |         |         | 5.6E-03              | 5.6E-04 | 3.4E-03 | 9.0E-05 | 2.7E-03               | 1.3E-04 |         |         |         |         | 5.0E-03 | 4.0E-04 |
| C23:0       |                        |         |         |         |                      |         |         |         |                       |         |         |         |         |         |         |         |
| C24:0       |                        |         |         |         |                      |         | 2.3E-03 | 1.8E-05 |                       |         |         |         |         |         |         |         |
| MUFA        |                        |         |         |         |                      |         |         |         |                       |         |         |         |         |         |         |         |
| C14:1 n-5   |                        |         |         |         |                      |         |         |         |                       |         |         |         |         |         |         |         |
| C15:1 n-5   |                        |         | 4.5E-01 | 3.4E-02 |                      |         |         |         |                       |         |         |         |         |         |         |         |
| C16:1 n-7   |                        |         |         |         | 4.3E-02              | 4.2E-03 | 4.2E-02 | 3.3E-03 | 5.1E-02               | 3.5E-03 | 3.6E-02 | 6.2E-03 | 6.4E-02 | 2.9E-03 | 1.5E-02 | 5.8E-03 |
| C17:1 n-7   |                        |         |         |         |                      |         | 1.3E-03 | 4.3E-05 | 2.2E-03               | 1.0E-04 |         |         |         |         |         |         |
| C18:1 n-9 t |                        |         |         |         |                      |         | 2.8E-03 | 2.3E-05 | 6.3E-03               | 1.1E-03 |         |         |         |         |         |         |
| C18:1 n-9 c | 1.2E-01                | 1.0E-02 | 7.3E-02 | 1.1E-02 | 2.4E-01              | 3.4E-03 | 2.9E-01 | 6.1E-04 | 2.8E-01               | 2.0E-02 | 2.8E-01 | 2.5E-02 | 2.6E-01 | 5.4E-03 | 1.5E-01 | 4.7E-03 |
| C20:1n-9    | 2.1E-02                | 2.6E-03 |         |         | 3.8E-03              | 1.4E-04 | 2.3E-02 | 2.9E-04 | 3.4E-02               | 2.6E-03 |         |         | 5.5E-02 | 4.5E-03 |         |         |
| C22:1 n-9   | 5.3E-02                | 4.2E-03 | 1.2E-01 | 1.9E-03 | 1.7E-01              | 1.1E-02 | 4.7E-02 | 2.3E-03 | 1.7E-02               | 7.5E-05 | 9.5E-02 | 7.3E-03 | 1.3E-02 | 1.1E-03 | 1.4E-01 | 6.9E-03 |
| C24:1 n-9   |                        |         |         |         |                      |         | 2.8E-03 | 1.6E-04 | 4.1E-03               | 2.0E-05 |         |         | 5.4E-03 | 3.2E-04 |         |         |
| PUFA        |                        |         |         |         |                      |         |         |         |                       |         |         |         |         |         |         |         |
| C18:2 n-6 t |                        |         |         |         |                      |         |         |         |                       |         |         |         |         |         |         |         |
| C18:2 n-6 c | 1.5E-02                | 1.7E-04 |         |         | 5.7E-02              | 2.2E-03 | 1.2E-01 | 3.3E-03 | 9.6E-02               | 1.0E-02 | 1.1E-02 | 1.1E-03 | 9.9E-02 | 2.0E-03 | 1.7E-02 | 3.1E-03 |
| C18:3 n-3   |                        |         |         |         | 1.7E-02              | 3.5E-04 | 8.9E-02 | 7.5E-03 | 4.6E-02               | 1.3E-02 |         |         | 3.4E-02 | 1.9E-03 |         |         |
| C18:3 n-6   |                        |         |         |         | 5.4E-03              | 8.1E-04 | 3.4E-03 | 4.4E-05 | 2.0E-03               | 2.9E-05 |         |         | 2.6E-03 | 2.2E-04 |         |         |
| C20:2 n-6   |                        |         |         |         |                      |         | 2.9E-03 | 1.4E-04 | 2.8E-03               | 8.7E-05 |         |         |         |         |         |         |
| C20:3 n-3   |                        |         |         |         |                      |         |         |         |                       |         |         |         |         |         |         |         |
| C20:3 n-6   |                        |         |         |         |                      |         | 1.3E-03 | 4.9E-05 |                       |         |         |         |         |         |         |         |
| C20:4 n-6   |                        |         |         |         |                      |         | 1.9E-03 | 4.3E-05 | 3.2E-03               | 7.1E-06 |         |         | 5.6E-03 | 1.4E-04 |         |         |

|           |         |  |         |  |         |         |         |         |         |         |         |         |         |         |         |         |
|-----------|---------|--|---------|--|---------|---------|---------|---------|---------|---------|---------|---------|---------|---------|---------|---------|
| C20:5 n-3 |         |  |         |  | 5.9E-02 | 2.3E-03 | 4.0E-02 | 1.9E-03 | 4.8E-02 | 6.6E-03 | 1.6E-01 | 7.0E-03 | 5.1E-02 | 2.5E-03 | 3.1E-01 | 2.7E-03 |
| C22:2 n-6 |         |  |         |  |         |         |         |         |         |         |         |         |         |         |         |         |
| C22:6 n-3 |         |  |         |  |         |         | 3.8E-02 | 3.4E-03 | 4.6E-02 | 4.0E-03 |         |         | 5.8E-02 | 2.4E-03 |         |         |
| ΣSFA      | 7.9E-01 |  | 3.6E-01 |  | 4.1E-01 |         | 3.0E-01 |         | 3.6E-01 |         | 4.2E-01 |         | 3.5E-01 |         | 3.7E-01 |         |
| ΣMUFA     | 1.9E-01 |  | 6.4E-01 |  | 4.5E-01 |         | 4.1E-01 |         | 4.0E-01 |         | 4.1E-01 |         | 4.0E-01 |         | 3.0E-01 |         |
| ΣPUFA     | 1.5E-02 |  | 0.0E+00 |  | 1.4E-01 |         | 3.0E-01 |         | 2.5E-01 |         | 1.7E-01 |         | 2.5E-01 |         | 3.2E-01 |         |
| Σω3       |         |  | 0.0E+00 |  | 7.6E-02 |         | 1.7E-01 |         | 1.4E-01 |         | 1.6E-01 |         | 1.4E-01 |         | 3.1E-01 |         |
| Σω6       | 1.5E-02 |  | 0.0E+00 |  | 6.2E-02 |         | 1.3E-01 |         | 1.0E-01 |         | 1.1E-02 |         | 1.1E-01 |         | 1.7E-02 |         |
| AI        | 3.2E+00 |  | 7.4E-01 |  | 7.9E-01 |         | 4.9E-01 |         | 6.1E-01 |         | 7.5E-01 |         | 6.3E-01 |         | 6.8E-01 |         |
| TI        | 7.6E+00 |  |         |  | 7.9E-01 |         | 1.3E-01 |         | 1.7E-01 |         | 5.2E-01 |         | 1.7E-01 |         | 2.9E-01 |         |
| HH        | 2.6E-01 |  | 2.1E-01 |  | 1.1E+00 |         | 2.5E+00 |         | 1.8E+00 |         | 1.3E+00 |         | 1.8E+00 |         | 1.4E+00 |         |

**Table S1.** Experimental values for the lipid profile and quality indices in the harvested seaweeds (Cont.).

| Seaweeds    | <i>Porphyra</i> spp. |         |         |         | <i>S. polyschides</i> |         |         |         | <i>Ulva</i> spp. |         |         |         |
|-------------|----------------------|---------|---------|---------|-----------------------|---------|---------|---------|------------------|---------|---------|---------|
| Harvest     | Summer               |         | Autumn  |         | Summer                |         | Autumn  |         | Summer           |         | Autumn  |         |
| Fatty acids | %                    | SD      | %       | SD      | %                     | SD      | %       | SD      | %                | SD      | %       | SD      |
| SFA         |                      |         |         |         |                       |         |         |         |                  |         |         |         |
| C14:0       | 3.8E-02              | 6.8E-03 | 4.2E-02 | 1.3E-02 | 3.8E-02               | 6.2E-03 | 3.4E-02 | 6.5E-04 | 3.4E-02          | 6.2E-03 |         |         |
| C15:0       |                      |         |         |         |                       |         | 3.7E-03 | 1.4E-04 |                  |         |         |         |
| C16:0       | 2.4E-01              | 1.7E-02 | 2.6E-01 | 3.2E-02 | 3.3E-01               | 8.8E-03 | 2.6E-01 | 1.7E-03 | 3.6E-01          | 2.0E-02 | 3.0E-01 | 9.3E-03 |
| C17:0       |                      |         |         |         |                       |         | 9.4E-03 | 3.5E-04 |                  |         |         |         |
| C18:0       | 1.4E-01              | 7.3E-03 | 1.4E-01 | 5.4E-02 | 7.1E-02               | 1.9E-02 | 4.4E-02 | 4.3E-04 | 1.9E-01          | 2.3E-02 | 1.8E-01 | 1.4E-02 |
| C20:0       |                      |         |         |         |                       |         | 1.0E-02 | 8.9E-05 |                  |         |         |         |
| C21:0       |                      |         |         |         |                       |         |         |         |                  |         |         |         |
| C22:0       | 3.3E-02              | 5.7E-03 |         |         |                       |         | 7.3E-03 | 1.9E-04 |                  |         |         |         |
| C23:0       |                      |         |         |         |                       |         |         |         |                  |         |         |         |
| C24:0       |                      |         |         |         |                       |         |         |         |                  |         |         |         |
| MUFA        |                      |         |         |         |                       |         |         |         |                  |         |         |         |
| C14:1 n-5   | 2.0E-02              | 3.4E-03 |         |         |                       |         |         |         |                  |         |         |         |
| C15:1 n-5   |                      |         |         |         |                       |         |         |         |                  |         |         |         |
| C16:1 n-7   | 5.1E-02              | 7.7E-03 |         |         |                       |         | 2.7E-02 | 8.0E-04 |                  |         | 4.9E-02 | 6.6E-03 |
| C17:1 n-7   | 2.5E-02              | 4.0E-03 |         |         |                       |         |         |         |                  |         |         |         |
| C18:1 n-9 t |                      |         |         |         |                       |         |         |         |                  |         |         |         |
| C18:1 n-9 c | 9.1E-02              | 9.1E-03 | 9.9E-02 | 1.4E-03 | 1.9E-01               | 3.3E-03 | 1.3E-01 | 4.0E-03 | 1.2E-01          | 1.7E-03 | 1.1E-01 | 6.0E-03 |
| C20:1n-9    | 3.7E-02              | 1.4E-03 |         |         |                       |         |         |         |                  |         |         |         |
| C22:1 n-9   | 1.1E-01              | 1.9E-03 | 1.6E-01 | 1.7E-03 | 2.1E-01               | 5.5E-03 | 1.8E-01 | 9.5E-04 | 2.7E-02          | 3.0E-03 |         |         |
| C24:1 n-9   |                      |         |         |         |                       |         |         |         |                  |         |         |         |
| PUFA        |                      |         |         |         |                       |         |         |         |                  |         |         |         |
| C18:2 n-6 t |                      |         |         |         |                       |         |         |         |                  |         |         |         |
| C18:2 n-6 c | 1.8E-02              | 1.3E-03 | 4.3E-02 | 1.1E-02 | 6.3E-02               | 1.9E-03 | 1.5E-01 | 3.4E-03 | 6.6E-02          | 1.5E-02 | 7.1E-02 | 2.8E-03 |

|              |         |         |         |         |         |         |         |         |         |         |         |         |
|--------------|---------|---------|---------|---------|---------|---------|---------|---------|---------|---------|---------|---------|
| C18:3 n-3    |         |         |         |         | 5.5E-02 | 5.8E-03 | 4.7E-02 | 8.8E-04 | 1.4E-01 | 1.8E-02 | 2.8E-01 | 2.0E-02 |
| C18:3 n-6    |         |         |         |         |         |         | 3.3E-02 | 6.5E-04 |         |         |         |         |
| C20:2 n-6    |         |         |         |         |         |         | 2.2E-03 | 2.2E-04 |         |         |         |         |
| C20:3 n-3    |         |         |         |         |         |         | 7.2E-04 | 7.9E-05 |         |         |         |         |
| C20:3 n-6    |         |         |         |         |         |         | 1.0E-03 | 1.1E-04 |         |         |         |         |
| C20:4 n-6    |         |         |         |         |         |         |         |         |         |         |         |         |
| C20:5 n-3    | 2.0E-01 | 6.4E-03 | 2.5E-01 | 1.8E-02 | 4.8E-02 | 4.9E-03 | 5.5E-02 | 2.7E-03 | 6.1E-02 | 5.1E-03 |         |         |
| C22:2 n-6    |         |         |         |         |         |         |         |         |         |         |         |         |
| C22:6 n-3    |         |         |         |         |         |         |         |         |         |         |         |         |
| <b>ΣSFA</b>  | 4.5E-01 |         | 4.5E-01 |         | 4.4E-01 |         | 3.7E-01 |         | 5.9E-01 |         | 4.8E-01 |         |
| <b>ΣMUFA</b> | 3.4E-01 |         | 2.6E-01 |         | 4.0E-01 |         | 3.4E-01 |         | 1.5E-01 |         | 1.6E-01 |         |
| <b>ΣPUFA</b> | 2.1E-01 |         | 2.9E-01 |         | 1.7E-01 |         | 2.9E-01 |         | 2.6E-01 |         | 3.5E-01 |         |
| <b>Σω3</b>   | 2.0E-01 |         | 2.5E-01 |         | 1.0E-01 |         | 1.0E-01 |         | 2.0E-01 |         | 2.8E-01 |         |
| <b>Σω6</b>   | 1.8E-02 |         | 4.3E-02 |         | 6.3E-02 |         | 1.8E-01 |         | 6.6E-02 |         | 7.1E-02 |         |
| <b>AI</b>    | 7.1E-01 |         | 7.6E-01 |         | 8.5E-01 |         | 6.4E-01 |         | 1.2E+00 |         | 5.9E-01 |         |
| <b>TI</b>    | 4.8E-01 |         | 4.6E-01 |         | 7.9E-01 |         | 5.9E-01 |         | 7.9E-01 |         | 4.9E-01 |         |
| <b>HH</b>    | 1.1E+00 |         | 1.3E+00 |         | 9.7E-01 |         | 1.3E+00 |         | 1.0E+00 |         | 1.5E+00 |         |

**Table S2.** Experimental values for the lipid profile and quality indices of the commercial seaweeds.

| Seaweeds              | <i>A. nodosum</i> |         | <i>C. crispus</i> |         |             |         | <i>F. vesiculosus</i> |         | <i>Laminaria</i> spp. |         | <i>Porphyra</i> spp. |         | <i>Ulva</i> spp. |         | <i>U. pinnatifida</i> |         |
|-----------------------|-------------------|---------|-------------------|---------|-------------|---------|-----------------------|---------|-----------------------|---------|----------------------|---------|------------------|---------|-----------------------|---------|
| Commercial production | Wild              |         | Wild              |         | Aquaculture |         | Wild                  |         | Wild                  |         | Aquaculture          |         | Aquaculture      |         | Wild                  |         |
| Fatty acids           | %                 | SD      | %                 | SD      | %           | SD      | %                     | SD      | %                     | SD      | %                    | SD      | %                | SD      | %                     | SD      |
| <b>SFA</b>            |                   |         |                   |         |             |         |                       |         |                       |         |                      |         |                  |         |                       |         |
| C12:0                 | 6.2E-04           | 4.9E-05 |                   |         |             |         |                       |         |                       |         |                      |         |                  |         |                       |         |
| C13:0                 |                   |         |                   |         |             |         |                       |         |                       |         |                      |         |                  |         |                       |         |
| C14:0                 | 9.0E-02           | 2.0E-03 | 2.6E-02           | 6.3E-03 | 4.7E-02     | 8.0E-04 | 1.2E-01               | 6.4E-03 | 3.7E-02               | 3.4E-03 | 2.0E-02              | 1.5E-03 | 3.3E-02          | 6.2E-04 | 3.2E-02               | 1.6E-03 |
| C15:0                 | 1.9E-03           | 1.3E-04 | 2.7E-03           | 7.7E-05 | 4.5E-03     | 1.7E-04 | 3.7E-03               | 5.3E-05 | 2.2E-03               | 2.3E-04 |                      |         | 3.2E-03          | 2.5E-04 |                       |         |
| C16:0                 | 9.7E-02           | 5.4E-03 | 2.3E-01           | 2.0E-02 | 2.4E-01     | 1.1E-02 | 1.4E-01               | 2.0E-03 | 2.3E-01               | 1.7E-02 | 2.3E-01              | 1.4E-02 | 2.1E-01          | 9.3E-04 | 2.4E-01               | 1.2E-02 |
| C17:0                 | 1.7E-03           | 5.7E-05 | 2.2E-03           | 3.0E-04 |             |         | 5.9E-03               | 4.2E-04 | 6.1E-03               | 2.3E-04 |                      |         | 2.2E-03          | 1.1E-04 | 9.1E-03               | 1.8E-04 |
| C18:0                 | 9.7E-03           | 9.2E-04 | 7.0E-02           | 4.2E-03 | 9.4E-02     | 6.3E-03 | 1.5E-02               | 4.3E-04 | 3.5E-02               | 1.4E-04 | 9.1E-02              | 2.6E-03 | 6.3E-02          | 7.1E-05 | 7.7E-02               | 4.1E-03 |
| C20:0                 | 4.5E-03           | 2.8E-04 | 1.6E-03           | 7.1E-05 |             |         | 4.0E-03               | 2.9E-04 | 3.4E-03               | 5.6E-05 |                      |         | 2.1E-03          | 1.1E-04 | 1.3E-02               | 2.2E-04 |
| C21:0                 | 5.2E-04           | 7.0E-06 |                   |         |             |         |                       |         |                       |         |                      |         |                  |         |                       |         |
| C22:0                 | 8.0E-03           | 1.9E-04 |                   |         |             |         | 4.6E-03               | 1.5E-04 |                       |         |                      |         | 3.5E-03          | 9.8E-06 |                       |         |
| C23:0                 | 8.3E-03           | 3.4E-04 |                   |         |             |         | 1.7E-03               | 3.4E-05 |                       |         |                      |         |                  |         |                       |         |
| C24:0                 | 1.9E-03           | 6.7E-05 | 1.4E-03           | 1.1E-04 |             |         | 2.2E-03               | 9.5E-05 |                       |         |                      |         | 1.3E-02          | 1.1E-03 |                       |         |
| <b>MUFA</b>           |                   |         |                   |         |             |         |                       |         |                       |         |                      |         |                  |         |                       |         |
| C14:1 n-5             | 2.4E-03           | 1.6E-04 |                   |         |             |         | 1.2E-03               | 8.6E-05 |                       |         |                      |         |                  |         |                       |         |
| C15:1 n-5             |                   |         |                   |         |             |         |                       |         |                       |         |                      |         |                  |         |                       |         |
| C16:1 n-7             | 1.5E-02           | 1.3E-03 | 3.3E-02           | 8.0E-03 | 6.8E-02     | 1.1E-03 | 2.5E-02               | 4.7E-04 | 3.9E-02               | 2.6E-03 | 3.9E-02              | 3.3E-03 | 4.8E-02          | 5.7E-05 | 9.6E-03               | 5.6E-04 |
| C17:1 n-7             | 9.1E-04           | 2.3E-05 |                   |         |             |         | 1.1E-03               | 4.2E-05 |                       |         |                      |         | 1.3E-03          | 5.4E-05 |                       |         |
| C18:1 n-9 t           |                   |         | 3.6E-03           | 7.9E-05 |             |         |                       |         |                       |         |                      |         | 3.9E-03          | 1.2E-04 |                       |         |
| C18:1 n-9 c           | 4.0E-01           | 8.7E-03 | 2.9E-01           | 2.1E-02 | 2.4E-01     | 1.4E-03 | 2.4E-01               | 6.9E-03 | 2.1E-01               | 1.9E-02 | 3.0E-01              | 5.5E-03 | 2.9E-01          | 7.3E-04 | 2.0E-01               | 1.4E-03 |
| C20:1n-9              | 2.5E-03           | 1.7E-04 | 2.0E-02           | 5.6E-03 | 7.4E-02     | 6.5E-03 | 1.2E-02               | 5.8E-04 | 1.4E-02               | 1.3E-03 | 2.3E-02              | 4.4E-04 | 4.7E-02          | 6.4E-04 |                       |         |
| C22:1 n-9             | 1.4E-01           | 9.4E-03 | 1.1E-02           | 1.4E-04 | 1.5E-02     | 2.1E-04 | 1.3E-01               | 4.7E-03 | 1.5E-01               | 1.8E-02 | 1.6E-02              | 1.8E-04 | 1.6E-02          | 9.1E-05 | 1.1E-01               | 1.9E-03 |
| C24:1 n-9             | 3.4E-04           | 3.0E-05 | 2.7E-03           | 1.8E-04 |             |         | 9.0E-04               | 7.3E-05 |                       |         |                      |         | 4.5E-03          | 5.6E-05 |                       |         |
| <b>PUFA</b>           |                   |         |                   |         |             |         |                       |         |                       |         |                      |         |                  |         |                       |         |
| C18:2 n-6 t           |                   |         |                   |         |             |         |                       |         |                       |         |                      |         |                  |         |                       |         |
| C18:2 n-6 c           | 1.0E-01           | 6.1E-04 | 1.2E-01           | 1.3E-02 | 8.5E-02     | 5.9E-03 | 9.9E-02               | 1.2E-04 | 1.1E-01               | 9.5E-03 | 1.4E-01              | 1.0E-02 | 1.1E-01          | 1.9E-04 | 1.2E-01               | 2.4E-03 |
| C18:3 n-3             | 3.4E-02           | 1.5E-03 | 1.2E-01           | 9.4E-03 | 3.4E-02     | 1.9E-03 | 7.6E-02               | 2.8E-03 | 8.1E-02               | 1.8E-02 | 9.0E-02              | 3.3E-03 | 8.3E-02          | 1.7E-04 | 1.3E-01               | 8.6E-03 |
| C18:3 n-6             | 1.8E-03           | 2.3E-05 | 3.2E-03           | 1.4E-04 |             |         | 2.3E-03               | 1.4E-04 | 3.1E-03               | 2.1E-04 |                      |         | 2.1E-03          | 2.9E-05 |                       |         |
| C20:2 n-6             | 2.1E-02           | 3.2E-04 | 3.1E-03           | 6.5E-05 |             |         | 1.2E-02               | 3.0E-04 | 2.1E-03               | 1.9E-04 |                      |         | 3.6E-03          | 9.2E-06 |                       |         |
| C20:3 n-3             | 3.3E-03           | 1.0E-04 |                   |         |             |         | 1.7E-03               | 6.6E-05 |                       |         |                      |         |                  |         |                       |         |
| C20:3 n-6             | 9.2E-04           | 7.1E-05 |                   |         |             |         | 9.9E-04               | 4.5E-05 |                       |         |                      |         | 1.7E-03          | 2.4E-05 |                       |         |

|              |         |         |         |         |         |         |         |         |         |         |         |         |         |         |         |         |
|--------------|---------|---------|---------|---------|---------|---------|---------|---------|---------|---------|---------|---------|---------|---------|---------|---------|
| C20:4 n-6    |         |         |         |         | 4.0E-03 | 5.9E-05 | 3.5E-04 | 3.1E-05 | 9.6E-04 | 2.2E-05 |         |         | 3.5E-03 | 2.1E-04 |         |         |
| C20:5 n-3    | 4.5E-02 | 3.8E-03 | 2.2E-02 | 4.8E-03 | 4.6E-02 | 3.2E-03 | 8.7E-02 | 1.6E-03 | 5.7E-02 | 5.6E-03 | 1.9E-02 | 8.9E-05 | 1.7E-02 | 7.8E-04 | 4.3E-02 | 3.0E-03 |
| C22:2 n-6    |         |         |         |         |         |         |         |         |         |         |         |         |         |         |         |         |
| C22:6 n-3    | 2.0E-03 | 2.7E-04 | 3.8E-02 | 2.2E-03 | 5.5E-02 | 4.3E-03 | 8.8E-03 | 1.0E-04 | 2.3E-02 | 1.4E-03 | 2.7E-02 | 8.3E-06 | 3.5E-02 | 1.6E-03 | 1.1E-02 | 2.7E-04 |
| <b>ΣSFA</b>  | 2.2E-01 |         | 3.3E-01 |         | 3.8E-01 |         | 3.0E-01 |         | 3.1E-01 |         | 3.4E-01 |         | 3.3E-01 |         | 3.7E-01 |         |
| <b>ΣMUFA</b> | 5.7E-01 |         | 3.6E-01 |         | 3.9E-01 |         | 4.1E-01 |         | 4.2E-01 |         | 3.8E-01 |         | 4.1E-01 |         | 3.2E-01 |         |
| <b>ΣPUFA</b> | 2.1E-01 |         | 3.1E-01 |         | 2.2E-01 |         | 2.9E-01 |         | 2.7E-01 |         | 2.8E-01 |         | 2.6E-01 |         | 3.0E-01 |         |
| <b>Σω3</b>   | 8.4E-02 |         | 1.8E-01 |         | 1.3E-01 |         | 1.7E-01 |         | 1.6E-01 |         | 1.4E-01 |         | 1.4E-01 |         | 1.8E-01 |         |
| <b>Σω6</b>   | 1.3E-01 |         | 1.3E-01 |         | 8.9E-02 |         | 1.1E-01 |         | 1.1E-01 |         | 1.4E-01 |         | 1.2E-01 |         | 1.2E-01 |         |
| <b>AI</b>    | 5.9E-01 |         | 4.9E-01 |         | 6.9E-01 |         | 8.7E-01 |         | 5.4E-01 |         | 4.7E-01 |         | 5.1E-01 |         | 5.9E-01 |         |
| <b>TI</b>    | 1.6E-01 |         | 1.5E-01 |         | 1.7E-01 |         | 1.2E-01 |         | 1.4E-01 |         | 2.1E-01 |         | 1.7E-01 |         | 1.6E-01 |         |
| <b>HH</b>    | 3.1E+00 |         | 2.3E+00 |         | 1.6E+00 |         | 2.0E+00 |         | 1.8E+00 |         | 2.3E+00 |         | 2.2E+00 |         | 1.8E+00 |         |

**Table S3.** Concentrations of aliphatic hydrocarbons (µg/g dry mass) and respective deviations found in seaweeds under study.

| Species                | Seaweeds collected | C18         | C19         | C20         | C22           | C24           | C28           | C32           | C36         | ΣAHCs     |
|------------------------|--------------------|-------------|-------------|-------------|---------------|---------------|---------------|---------------|-------------|-----------|
| <i>A. nodosum</i>      | Su                 | 12 ± 1      | 5.7 ± 0.7   | 2.3 ± 0.2   | 1.1 ± 0.1     | 0.68 ± 0.09   | 0.19 ± 0.03   | 0.34 ± 0.13   | 0.83 ± 0.01 | 31 ± 12   |
|                        | Wi                 | n.d.        | 0.63 ± 0.03 | 0.67 ± 0.04 | 0.35 ± 0.04   | 5.9 ± 0.1     | 0.42 ± 0.01   | 0.25 ± 0.01   | n.d.        | 11 ± 5    |
| <i>C. crispus</i>      | Sp                 | 1.9 ± 0.2   | 0.87 ± 0.09 | 0.60 ± 0.07 | 0.24 ± 0.07   | 0.24 ± 0.03   | 0.085 ± 0.017 | n.d.          | n.d.        | 5.4 ± 2.2 |
|                        | Su                 | 1.2 ± 0.2   | 0.61 ± 0.05 | 0.46 ± 0.09 | 0.31 ± 0.10   | 0.30 ± 0.06   | 0.22 ± 0.03   | 0.24 ± 0.05   | n.d.        | 4.6 ± 2.0 |
|                        | Au                 | 2.7 ± 0.3   | 0.31 ± 0.01 | 0.59 ± 0.05 | 0.46 ± 0.10   | 0.20 ± 0.03   | 0.20 ± 0.04   | n.d.          | n.d.        | 6.1 ± 2.5 |
|                        | Cm <sup>a</sup>    | 11 ± 1      | 0.20 ± 0.01 | 0.24 ± 0.02 | 0.22 ± 0.01   | 1.1 ± 0.3     | 3.3 ± 0.9     | 1.2 ± 0.4     | 0.23 ± 0.09 | 13 ± 10   |
|                        | Cm <sup>b</sup>    | 0.27 ± 0.02 | 0.32 ± 0.04 | 0.41 ± 0.01 | 0.24 ± 0.02   | 0.17 ± 0.02   | 0.45 ± 0.03   | 0.076 ± 0.010 | 0.21 ± 0.01 | 2.8 ± 1.1 |
| <i>F. spiralis</i>     | Sp                 | 4.4 ± 0.2   | 1.8 ± 0.2   | 1.1 ± 0.1   | 0.52 ± 0.03   | 0.34 ± 0.12   | 0.45 ± 0.04   | n.d.          | n.d.        | 11 ± 5    |
|                        | Su                 | 4.7 ± 0.6   | 2.0 ± 0.3   | 1.2 ± 0.2   | 0.71 ± 0.14   | 0.36 ± 0.05   | 0.50 ± 0.10   | n.d.          | n.d.        | 13 ± 6    |
| <i>F. vesiculosus</i>  | Cm <sup>b</sup>    | 0.77 ± 0.11 | 1.2 ± 0.1   | 0.78 ± 0.01 | 0.75 ± 0.03   | 2.2 ± 0.09    | 0.73 ± 0.02   | 0.50 ± 0.13   | 2.8 ± 0.1   | 12 ± 4    |
| <i>Gracilaria</i> spp. | Sp                 | 1.0 ± 0.1   | 0.64 ± 0.04 | 0.19 ± 0.01 | 0.26 ± 0.04   | 0.26 ± 0.01   | 0.27 ± 0.01   | n.d.          | n.d.        | 3.6 ± 1.5 |
|                        | Au                 | 3.2 ± 0.2   | 0.41 ± 0.02 | 0.48 ± 0.05 | 0.68 ± 0.05   | 0.20 ± 0.04   | 0.24 ± 0.07   | n.d.          | n.d.        | 7.0 ± 2.9 |
| <i>L. ochroleuca</i>   | Sp                 | 0.58 ± 0.11 | 0.56 ± 0.10 | 0.26 ± 0.01 | 0.25 ± 0.08   | 0.21 ± 0.04   | 0.19 ± 0.04   | 0.14 ± 0.04   | n.d.        | 3.1 ± 1.3 |
|                        | Su                 | n.d.        | 0.16 ± 0.01 | 0.28 ± 0.06 | 0.18 ± 0.01   | 0.41 ± 0.08   | 0.31 ± 0.04   | 0.067 ± 0.021 | 0.49 ± 0.01 | 2.4 ± 0.8 |
| <i>Laminaria</i> spp.  | Cm <sup>b</sup>    | n.d.        | 1.1 ± 0.1   | 0.57 ± 0.03 | 0.60 ± 0.06   | 3.4 ± 0.2     | 0.387568      | 0.092 ± 0.03  | n.d.        | 8.3 ± 3.5 |
| <i>O. pinnatifida</i>  | Sp                 | 7.1 ± 0.6   | 2.6 ± 0.3   | 1.3 ± 0.1   | 0.72 ± 0.08   | 0.72 ± 0.21   | 0.63 ± 0.06   | 0.41 ± 0.06   | 0.34 ± 0.13 | 19 ± 8    |
|                        | Au                 | n.d.        | 0.17 ± 0.03 | 0.17 ± 0.04 | 0.072 ± 0.010 | 0.036 ± 0.007 | 0.24 ± 0.04   | 0.039 ± 0.009 | n.d.        | 1.0 ± 0.4 |
| <i>Porphyra</i> spp.   | Su                 | 2.8 ± 0.2   | 1.2 ± 0.1   | 0.59 ± 0.10 | 0.54 ± 0.09   | 0.57 ± 0.11   | 0.44 ± 0.08   | 0.82 ± 0.18   | n.d.        | 9.6 ± 4.0 |
|                        | Au                 | 7.4 ± 0.5   | 1.0 ± 0.2   | 1.2 ± 0.1   | 1.6 ± 0.3     | 0.45 ± 0.12   | 0.38 ± 0.05   | n.d.          | n.d.        | 17 ± 7    |
|                        | Cm <sup>b</sup>    | 0.56 ± 0.02 | 0.52 ± 0.05 | 0.58 ± 0.05 | 0.33 ± 0.01   | 0.044 ± 0.012 | 0.47 ± 0.02   | 0.085 ± 0.009 | 0.52 ± 0.10 | 4.1 ± 1.5 |
| <i>Ulva</i> spp.       | Su                 | 3.2 ± 0.2   | 3.7 ± 0.4   | 1.1 ± 0.1   | 0.62 ± 0.01   | 0.32 ± 0.01   | 0.49 ± 0.13   | n.d.          | n.d.        | 13 ± 5    |
|                        | Au                 | 6.3 ± 0.8   | 1.5 ± 0.1   | 1.8 ± 0.2   | 1.1 ± 0.1     | 0.19 ± 0.03   | 0.22 ± 0.02   | n.d.          | n.d.        | 15 ± 6    |
|                        | Cm <sup>b</sup>    | 0.60 ± 0.03 | 0.46 ± 0.04 | 0.51 ± 0.02 | 0.55 ± 0.06   | 4.0 ± 0.1     | 7.7 ± 0.4     | 1.9 ± 0.09    | n.d.        | 21 ± 9    |

|                       |                 |             |             |             |             |             |             |             |             |           |
|-----------------------|-----------------|-------------|-------------|-------------|-------------|-------------|-------------|-------------|-------------|-----------|
| <i>U. pinnatifida</i> | Su              | 10 ± 1      | 5.3 ± 0.7   | 2.2 ± 0.5   | 1.1 ± 0.4   | 0.72 ± 0.16 | 0.48 ± 0.14 | 0.29 ± 0.07 | n.d.        | 28 ± 12   |
|                       | Wi              | 2.3 ± 0.1   | 0.56 ± 0.04 | 0.45 ± 0.02 | 0.45 ± 0.03 | 0.14 ± 0.01 | 0.12 ± 0.01 | n.d.        | n.d.        | 5.4 ± 2.3 |
|                       | Cm <sup>a</sup> | 0.20 ± 0.03 | 0.25 ± 0.06 | 0.51 ± 0.07 | 0.28 ± 0.02 | 3.0 ± 0.9   | 1.9 ± 0.2   | 0.83 ± 0.22 | 0.67 ± 0.05 | 10 ± 4    |

Sp: Spring; Su: Summer; Au: Autumn; Wi: Winter; Cm<sup>a</sup>: Commercial wild origin; Cm<sup>b</sup>: Commercial aquaculture origin.

The seaweeds harvested at different times of the year and the ones acquired in Portugal were analyzed. It should be noted that table S3 does not show the results for all samples since even after adding activated carbon, it was impossible to remove the color from the sample altogether, and it was not possible to proceed with the analysis of the sample by GC.
